# Supplementary material for: Neurological and Psychological Sequelae Associated With Multisystem Inflammatory Syndrome in Children
Source: PubMed Central journal article supplement (PMC10357334; doi:10.1001/jamanetworkopen.2023.24369), 2023-07-19
Supplement: jamanetwopen-e2324369-s001.pdf [file jamanetwopen-e2324369-s001.pdf]

## Supplemental Online Content

Rollins CK, Calderon J, Wypij D, et al; Overcoming COVID-19 Investigators. Neurological and psychological sequelae associated with multisystem inflammatory syndrome in children. *JAMA Netw Open*. 2023;6(7):e2324369. doi:10.1001/jamanetworkopen.2023.24369

**eFigure 1.** Control Selection Hierarchy

**eFigure 2.** Enrollment Flowchart

**eTable 1.** Abnormal Neurological Examination Findings by Group

**eTable 2.** Sensitivity Analysis Including Matched Pairs Only

**eTable 3.** Sensitivity Analysis Excluding Patients With ADHD (Unmedicated), Anxiety, and Autism

**eTable 4.** Associations Between Selected Demographic and Hospitalization-Related Medical Variables and Neuropsychological Outcome Measures Among MIS-C Participants

This supplemental material has been provided by the authors to give readers additional information about their work.

**eFigure 1.**  
**Control Selection Hierarchy**

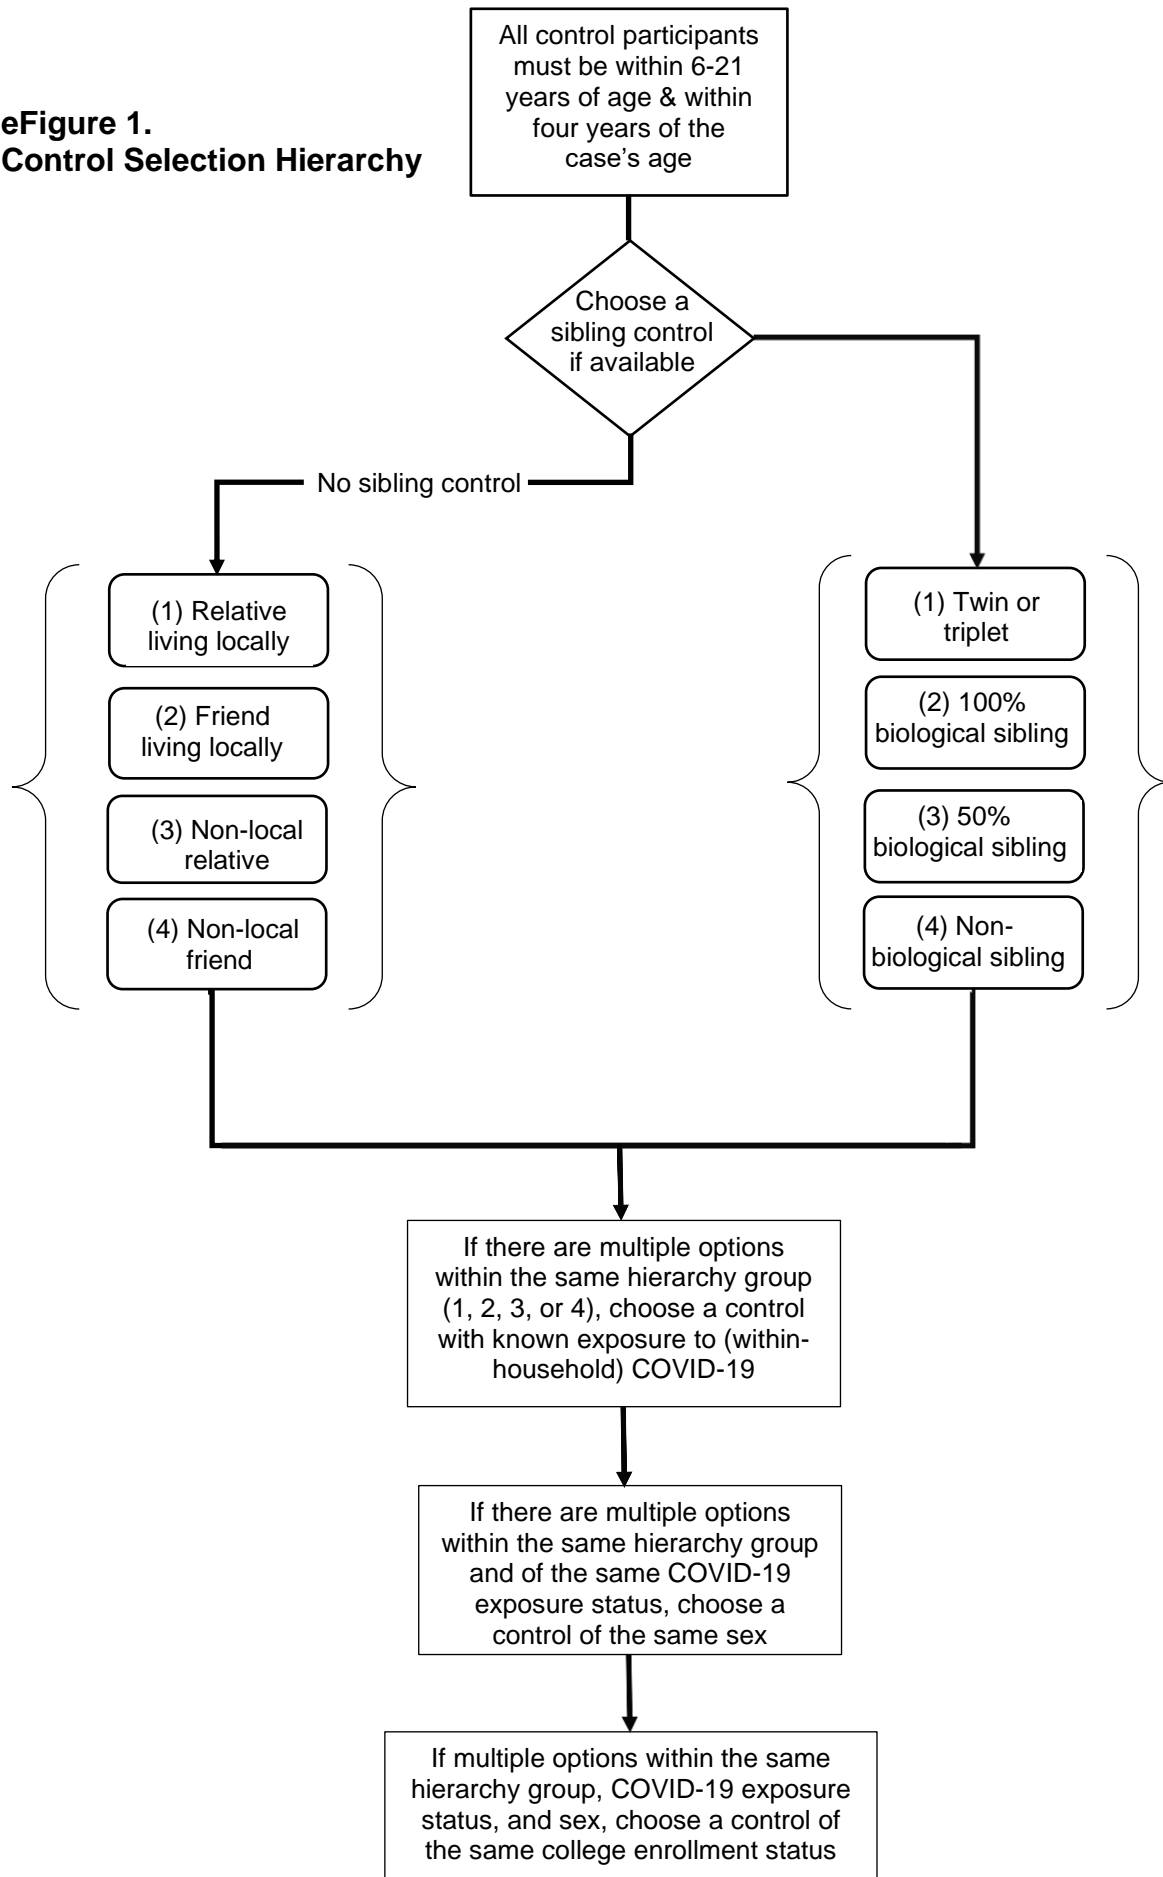

**eFigure 2. Enrollment Flowchart**

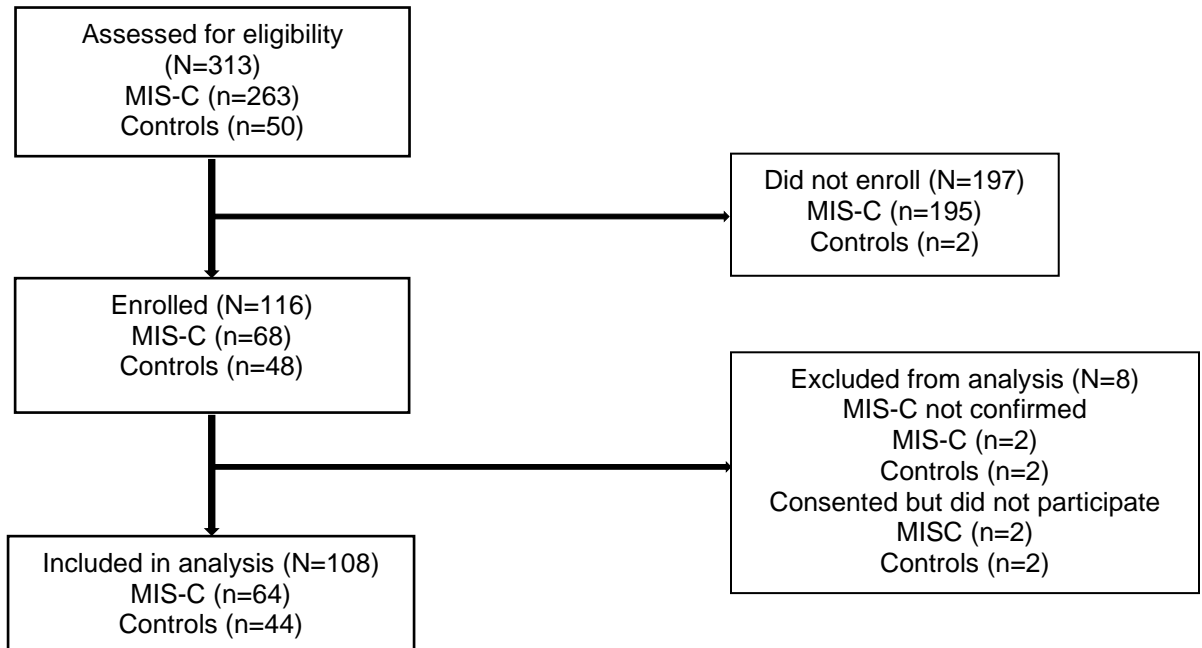

**eTable 1. Abnormal Neurological Examination Findings by Group**

| <b>Neurological Exam Component</b>              | <b>MIS-C<br/>Participants,<br/>n/N (%)<br/>(N = 61)</b> | <b>Control<br/>Participants,<br/>n/N (%)<br/>(N = 43)</b> |
|-------------------------------------------------|---------------------------------------------------------|-----------------------------------------------------------|
| <b>Cranial nerves</b>                           |                                                         |                                                           |
| Visual fields                                   | 0/61                                                    | 0/43                                                      |
| Extraocular movements                           | 0/61                                                    | 0/43                                                      |
| Facial strength and symmetry                    | 0/61                                                    | 0/43                                                      |
| Hearing to finger rub                           | 1/61 (2)                                                | 0/43                                                      |
| <b>Motor<sup>a</sup></b>                        |                                                         |                                                           |
| Axial tone                                      | 2/61 (3)                                                | 0/43                                                      |
| Upper extremity tone                            | 3/50 (6)                                                | 0/34                                                      |
| Upper extremity strength <sup>b</sup>           | 2/61 (3)                                                | 1/43 (2)                                                  |
| Upper extremity symmetry of movement            | 0/60                                                    | 0/43                                                      |
| Lower extremity tone                            | 0/61                                                    | 0/42                                                      |
| Lower extremity strength <sup>b</sup>           | 6/61 (10)                                               | 1/43 (2)                                                  |
| Lower extremity symmetry of movement            | 2/60 (3)                                                | 0/43 (1)                                                  |
| Finger Tapping                                  | 3/51 (6)                                                | 0/33                                                      |
| Finger Sequencing                               | 3/51 (6)                                                | 1/33 (3)                                                  |
| Orbiting                                        | 0/60                                                    | 0/42                                                      |
| Pronator Drift                                  | 1/61 (2)                                                | 0/42                                                      |
| <b>Coordination</b>                             |                                                         |                                                           |
| Dysmetria                                       | 2/61 (3)                                                | 0/42                                                      |
| Heel-Knee-Shin                                  | 1/61 (2)                                                | 1/42 (2)                                                  |
| <b>Gait</b>                                     |                                                         |                                                           |
| Standard and Stress Gait Maneuvers <sup>c</sup> | 3/61 (5)                                                | 1/42 (2)                                                  |
| <b>Overall Impression Abnormal</b>              | <b>15/61 (25)</b>                                       | <b>3/43 (7)</b>                                           |

<sup>a</sup>Motor exam conducted separately for left and right sides, combined here for ease of interpretation

<sup>b</sup>Confrontation testing performed by parent or other adult under guidance and direct observation of board-certified child neurologist who demonstrated how to isolate individual muscle groups and directly observed and solicited feedback to report findings

<sup>c</sup>Stress gait maneuvers included toe walk, heel walk, tandem gait, outside of feet, and inside of feet

**eTable 2. Sensitivity Analysis Including Matched Pairs Only**

| <b>Outcome<sup>a</sup></b>                                                    | <b>MIS-C<br/>Participants<br/>mean (SD)</b> | <b>Control<br/>Participants,<br/>mean (SD)</b> | <b>Mean Difference<br/>MIS-C vs Controls<br/>(95% CI)<sup>b</sup></b> | <b>Standardized<br/>Mean Difference<br/>MIS-C vs Controls<br/>(95% CI)<sup>b,c</sup></b> |
|-------------------------------------------------------------------------------|---------------------------------------------|------------------------------------------------|-----------------------------------------------------------------------|------------------------------------------------------------------------------------------|
| <b>Wechsler Intelligence Scales (WASI-II, WISC-V, WAIS-IV)</b>                |                                             |                                                |                                                                       |                                                                                          |
| IQ estimate                                                                   | 101.8 (13.2)                                | 103.5 (14.2)                                   | -1.7 (-6.1 to 2.7)                                                    | -0.11 (-0.41 to 0.18)                                                                    |
| Working Memory Index                                                          | 99.8 (15.3)                                 | 103.0 (15.5)                                   | -3.2 (-8.8 to 2.4)                                                    | -0.21 (-0.59 to 0.16)                                                                    |
| Processing Speed Index                                                        | 95.5 (16.1)                                 | 96.8 (14.7)                                    | -1.2 (-7.8 to 5.3)                                                    | -0.08 (-0.52 to 0.35)                                                                    |
| <b>NIH Cognition Toolbox</b>                                                  |                                             |                                                |                                                                       |                                                                                          |
| List Sort Working Memory                                                      | 98.7 (12.8)                                 | 103.1 (10.5)                                   | -4.4 (-9.4 to 0.5)                                                    | -0.29 (-0.63 to 0.03)                                                                    |
| Picture Sequence Memory                                                       | 101.7 (15.8)                                | 102.8 (18.0)                                   | -1.1 (-7.0 to 4.8)                                                    | -0.07 (-0.47 to 0.32)                                                                    |
| <b>Delis-Kaplan Executive Function System (D-KEFS)</b>                        |                                             |                                                |                                                                       |                                                                                          |
| Verbal Fluency Switching                                                      | 10.7 (3.1)                                  | 10.8 (2.7)                                     | 0.0 (-1.4 to 1.3)                                                     | 0.00 (-0.47 to 0.43)                                                                     |
| Color-Word Interference Switching                                             | 9.1 (3.1)                                   | 9.6 (3.1)                                      | -0.5 (-1.8 to 0.7)                                                    | -0.17 (-0.60 to 0.23)                                                                    |
| BRIEF <sup>d</sup> Global Executive Composite                                 | 50.8 (9.5)                                  | 50.7 (10.7)                                    | 0.2 (-3.1 to 3.4)                                                     | 0.02 (-0.31 to 0.34)                                                                     |
| <b>Behavior Assessment Scale for Children-3<sup>rd</sup> Edition (BASC-3)</b> |                                             |                                                |                                                                       |                                                                                          |
| Internalizing Problems                                                        | 50.3 (11.1)                                 | 47.6 (8.0)                                     | 2.7 (-0.8 to 6.2)                                                     | 0.27 (-0.08 to 0.62)                                                                     |
| Anxiety                                                                       | 48.3 (9.3)                                  | 49.5 (10.5)                                    | -1.2 (-4.8 to 2.5)                                                    | -0.12 (-0.48 to 0.25)                                                                    |
| Depression                                                                    | 49.8 (10.2)                                 | 47.9 (9.5)                                     | 1.9 (-1.6 to 5.4)                                                     | 0.19 (-0.16 to 0.54)                                                                     |
| Somatization                                                                  | 52.6 (12.8)                                 | 46.4 (7.0)                                     | 6.2 (2.0 to 10.1)                                                     | 0.62 (0.20 to 1.01)                                                                      |
| Externalizing Problems                                                        | 48.7 (7.8)                                  | 47.0 (8.3)                                     | 1.6 (-1.2 to 4.5)                                                     | 0.16 (-0.12 to 0.45)                                                                     |
| Hyperactivity                                                                 | 48.9 (9.6)                                  | 47.1 (9.8)                                     | 1.8 (-2.2 to 5.7)                                                     | 0.18 (-0.22 to 0.57)                                                                     |
| Aggression                                                                    | 48.9 (7.2)                                  | 48.2 (7.0)                                     | 0.7 (-1.8 to 3.1)                                                     | 0.07 (-0.18 to 0.31)                                                                     |
| Conduct Problems                                                              | 48.6 (6.7)                                  | 46.7 (7.7)                                     | 1.9 (-0.5 to 4.4)                                                     | 0.19 (-0.05 to 0.44)                                                                     |
| Behavioral Symptoms Index <sup>e</sup>                                        | 48.1 (8.2)                                  | 47.2 (10.0)                                    | 0.9 (-2.2 to 4.0)                                                     | 0.09 (-0.22 to 0.40)                                                                     |
| Atypicality                                                                   | 47.1 (7.4)                                  | 48.0 (11.0)                                    | -0.9 (-4.6 to 2.8)                                                    | -0.09 (-0.46 to 0.28)                                                                    |
| Withdrawal                                                                    | 48.5 (11.6)                                 | 48.1 (10.4)                                    | 0.3 (-4.0 to 4.7)                                                     | 0.03 (-0.04 to 0.47)                                                                     |
| Attention Problems                                                            | 48.0 (11.5)                                 | 46.9 (9.5)                                     | 1.1 (-2.8 to 5.0)                                                     | 0.11 (-0.28 to 0.50)                                                                     |
| Adaptive Skills Composite                                                     | 52.5 (10.1)                                 | 53.0 (11.2)                                    | -0.5 (-3.6 to 2.5)                                                    | -0.05 (-0.36 to 0.25)                                                                    |
| <b>PedsQL Generic</b>                                                         |                                             |                                                |                                                                       |                                                                                          |
| Self-report Total                                                             | 83.0 (11.2)                                 | 85.2 (12.6)                                    | -2.1 (-6.5 to 2.2)                                                    | -0.16 (-0.49 to 0.17)                                                                    |
| Physical health                                                               | 87.3 (14.2)                                 | 89.3 (12.2)                                    | -1.9 (-6.6 to 2.7)                                                    | -0.14 (-0.48 to 0.19)                                                                    |
| Psychosocial health                                                           | 80.8 (11.5)                                 | 83.0 (14.8)                                    | -2.3 (-7.1 to 2.6)                                                    | -0.16 (-0.48 to 0.18)                                                                    |
| Parent-report Total                                                           | 84.8 (11.1)                                 | 88.6 (13.2)                                    | -3.8 (-8.0 to 0.5)                                                    | -0.24 (-0.50 to 0.03)                                                                    |
| Physical health                                                               | 91.6 (11.1)                                 | 90.9 (18.8)                                    | 0.8 (-5.5 to 7.0)                                                     | 0.04 (-0.28 to 0.35)                                                                     |
| Psychosocial health                                                           | 81.2 (13.3)                                 | 87.4 (12.5)                                    | -6.2 (-10.1 to -2.3)                                                  | -0.39 (-0.64 to -0.15)                                                                   |

| <b>Outcome<sup>a</sup></b>             | <b>MIS-C<br/>Participants<br/>mean (SD)</b> | <b>Control<br/>Participants,<br/>mean (SD)</b> | <b>Mean Difference<br/>MIS-C vs Controls<br/>(95% CI)<sup>b</sup></b> | <b>Standardized<br/>Mean Difference<br/>MIS-C vs Controls<br/>(95% CI)<sup>b,c</sup></b> |
|----------------------------------------|---------------------------------------------|------------------------------------------------|-----------------------------------------------------------------------|------------------------------------------------------------------------------------------|
| <b>PedsQL Multidimensional Fatigue</b> |                                             |                                                |                                                                       |                                                                                          |
| Self-report Total                      | 78.2 (16.0)                                 | 81.4 (14.3)                                    | -3.3 (-7.8 to 1.3)                                                    | -0.25 (-0.59 to 0.10)                                                                    |
| General fatigue                        | 83.9 (15.8)                                 | 84.3 (18.2)                                    | -0.5 (-7.2 to 6.3)                                                    | -0.03 (-0.48 to 0.42)                                                                    |
| Sleep-rest fatigue                     | 73.6 (22.3)                                 | 80.3 (17.0)                                    | -6.6 (-12.9 to -0.4)                                                  | -0.35 (-0.69 to -0.02)                                                                   |
| Cognitive fatigue                      | 76.9 (20.3)                                 | 79.6 (18.0)                                    | -2.7 (-9.3 to 3.9)                                                    | -0.15 (-0.53 to 0.22)                                                                    |
| Parent-report Total                    | 83.2 (17.8)                                 | 87.3 (17.1)                                    | -4.1 (-10.5 to 2.4)                                                   | -0.36 (-0.92 to 0.21)                                                                    |
| General fatigue                        | 85.0 (19.0)                                 | 88.1 (18.8)                                    | -3.0 (-10.3 to 4.2)                                                   | -0.23 (-0.77 to 0.32)                                                                    |
| Sleep-rest fatigue                     | 80.0 (22.8)                                 | 88.2 (16.4)                                    | -8.2 (-16.3 to -0.1)                                                  | -0.55 (-1.11 to -0.01)                                                                   |
| Cognitive fatigue                      | 84.7 (19.7)                                 | 85.7 (24.3)                                    | -1.0 (-9.5 to 7.4)                                                    | -0.07 (-0.63 to 0.49)                                                                    |
| PROMIS Sleep Disturbance               | 52.4 (9.2)                                  | 50.8 (7.7)                                     | 1.6 (-2.1 to 5.3)                                                     | 0.16 (-0.21 to 0.53)                                                                     |
| PROMIS Sleep Impairment                | 47.6 (8.3)                                  | 47.5 (9.3)                                     | 0.1 (-2.7 to 2.9)                                                     | 0.01 (-0.27 to 0.29)                                                                     |
| Functional Disability Inventory        | 3.8 (5.9)                                   | 2.7 (4.0)                                      | 1.1 (-1.0 to 3.3)                                                     | 0.28 (-0.25 to 0.83)                                                                     |

<sup>a</sup>Includes 44 Pairs; IQ Estimate (n = 41 pairs), Working Memory Index (n = 41), Processing Speed Index (n = 30; due to non-return of mailed booklets), List Sort Working Memory (n = 41), Picture Sequence Memory (n = 42), D-KEFS (n = 37; used only for age ≥8y), BRIEF (n = 43), BASC-3 (n = 39), PedsQL self- (n = 37) and parent-report (n = 37; due to survey non-completion), PROMIS (n = 39), and Functional Disability Inventory (n = 37)

<sup>b</sup>Adjusted for matched pairs

<sup>c</sup>Standardized mean difference is the effect size relative to 1 SD based on test parameters or normative data except for Functional Disability Inventory where sample SD was substituted given lack of normative data

<sup>d</sup>BRIEF = Behavior Rating Inventory of Executive Function, includes BRIEF-2 and BRIEF-A

<sup>e</sup>Includes depression, hyperactivity, aggression, atypicality, withdrawal, attention

**eTable 3. Sensitivity Analysis Excluding Patients with ADHD (Unmedicated), Anxiety, and Autism**

| <b>Outcome<sup>a</sup></b>                                                    | <b>MIS-C<br/>Participants<br/>Score,<br/>mean (SD)<br/>(N = 53)</b> | <b>Control<br/>Participants<br/>Score,<br/>mean (SD)<br/>(N = 42)</b> | <b>Mean Difference<br/>MIS-C vs Controls<br/>(95% CI)<sup>b</sup></b> | <b>Standardized<br/>Mean Difference<br/>MIS-C vs Controls<br/>(95% CI)<sup>b,c</sup></b> |
|-------------------------------------------------------------------------------|---------------------------------------------------------------------|-----------------------------------------------------------------------|-----------------------------------------------------------------------|------------------------------------------------------------------------------------------|
| <b>Wechsler Intelligence Scales (WASI-II, WISC-V, WAIS-IV)</b>                |                                                                     |                                                                       |                                                                       |                                                                                          |
| IQ estimate                                                                   | 102.2 (13.8)                                                        | 103.8 (14.3)                                                          | -0.8 (-5.2 to 3.7)                                                    | -0.05 (-0.37 to 0.25)                                                                    |
| Working Memory Index                                                          | 99.3 (15.2)                                                         | 103.1 (15.8)                                                          | -3.5 (-9.3 to 2.4)                                                    | -0.23 (-0.62 to 0.16)                                                                    |
| Processing Speed Index                                                        | 98.3 (16.3)                                                         | 96.8 (14.3)                                                           | 0.9 (-5.4 to 7.2)                                                     | 0.06 (-0.36 to 0.48)                                                                     |
| <b>NIH Cognition Toolbox</b>                                                  |                                                                     |                                                                       |                                                                       |                                                                                          |
| List Sort Working Memory                                                      | 95.9 (14.2)                                                         | 102.5 (10.3)                                                          | -6.5 (-11.5 to -1.6)                                                  | -0.43 (-0.77 to -0.11)                                                                   |
| Picture Sequence Memory                                                       | 99.7 (14.4)                                                         | 102.8 (18.2)                                                          | -2.5 (-8.4 to 3.4)                                                    | -0.17 (-0.56 to 0.23)                                                                    |
| <b>Delis-Kaplan Executive Function System (D-KEFS)</b>                        |                                                                     |                                                                       |                                                                       |                                                                                          |
| Verbal Fluency Switching                                                      | 10.6 (3.2)                                                          | 10.7 (2.5)                                                            | -0.1 (-1.4 to 1.1)                                                    | -0.03 (-0.47 to 0.37)                                                                    |
| Color-Word Interference Switching                                             | 8.9 (3.3)                                                           | 9.8 (3.2)                                                             | -0.8 (-2.0 to 0.4)                                                    | -0.27 (-0.67 to 0.13)                                                                    |
| BRIEF <sup>d</sup> Global Executive Composite                                 | 50.5 (9.5)                                                          | 50.4 (10.8)                                                           | 0.3 (-3.1 to 3.7)                                                     | 0.03 (-0.31 to 0.37)                                                                     |
| <b>Behavior Assessment Scale for Children-3<sup>rd</sup> Edition (BASC-3)</b> |                                                                     |                                                                       |                                                                       |                                                                                          |
| Internalizing Problems                                                        | 51.7 (11.7)                                                         | 47.8 (8.0)                                                            | 3.8 (0.3 to 7.3)                                                      | 0.38 (0.03 to 0.73)                                                                      |
| Anxiety                                                                       | 49.4 (9.7)                                                          | 49.4 (10.2)                                                           | -0.1 (-3.8 to 3.6)                                                    | -0.01 (-0.38 to 0.36)                                                                    |
| Depression                                                                    | 50.6 (11.0)                                                         | 47.8 (9.4)                                                            | 2.8 (-0.8 to 6.4)                                                     | 0.28 (-0.08 to 0.64)                                                                     |
| Somatization                                                                  | 54.3 (14.2)                                                         | 47.2 (7.7)                                                            | 7.0 (2.8 to 11.4)                                                     | 0.70 (0.28 to 1.14)                                                                      |
| Externalizing Problems                                                        | 48.0 (7.5)                                                          | 47.2 (8.3)                                                            | 0.9 (-2.0 to 3.7)                                                     | 0.09 (-0.20 to 0.37)                                                                     |
| Hyperactivity                                                                 | 48.3 (9.1)                                                          | 47.8 (9.7)                                                            | 0.4 (-3.2 to 4.0)                                                     | 0.04 (-0.32 to 0.40)                                                                     |
| Aggression                                                                    | 48.2 (7.3)                                                          | 47.8 (6.6)                                                            | 0.6 (-1.8 to 3.1)                                                     | 0.06 (-0.18 to 0.31)                                                                     |
| Conduct Problems                                                              | 48.0 (6.5)                                                          | 46.9 (7.9)                                                            | 1.4 (-1.1 to 4.0)                                                     | 0.14 (-0.11 to 0.40)                                                                     |
| Behavioral Symptoms Index <sup>e</sup>                                        | 48.0 (8.2)                                                          | 47.2 (10.2)                                                           | 0.7 (-2.6 to 4.1)                                                     | 0.07 (-0.26 to 0.41)                                                                     |
| Atypicality                                                                   | 47.3 (7.2)                                                          | 48.0 (11.1)                                                           | -0.9 (-4.7 to 2.9)                                                    | -0.09 (-0.47 to 0.29)                                                                    |
| Withdrawal                                                                    | 48.9 (10.9)                                                         | 47.4 (9.5)                                                            | 1.8 (-2.1 to 5.6)                                                     | 0.18 (-0.21 to 0.56)                                                                     |
| Attention Problems                                                            | 47.5 (11.1)                                                         | 47.6 (10.4)                                                           | -0.4 (-3.9 to 3.2)                                                    | -0.04 (-0.39 to 0.32)                                                                    |
| Adaptive Skills Composite                                                     | 53.3 (10.0)                                                         | 52.6 (11.4)                                                           | -0.0 (-3.2 to 3.2)                                                    | -0.00 (-0.32 to 0.32)                                                                    |
| <b>PedsQL Generic</b>                                                         |                                                                     |                                                                       |                                                                       |                                                                                          |
| Self-report Total                                                             | 81.8 (12.3)                                                         | 86.1 (12.4)                                                           | -3.6 (-8.0 to 0.9)                                                    | -0.27 (-0.61 to 0.07)                                                                    |
| Physical health                                                               | 85.6 (15.9)                                                         | 90.6 (10.6)                                                           | -4.4 (-9.1 to 0.3)                                                    | -0.32 (-0.66 to 0.02)                                                                    |
| Psychosocial health                                                           | 79.8 (12.5)                                                         | 83.7 (14.7)                                                           | -3.2 (-8.2 to 1.9)                                                    | -0.22 (-0.56 to 0.13)                                                                    |
| Parent-report Total                                                           | 83.1 (12.0)                                                         | 89.4 (12.9)                                                           | -5.5 (-9.9 to -1.2)                                                   | -0.35 (-0.62 to -0.08)                                                                   |
| Physical health                                                               | 88.6 (13.5)                                                         | 92.1 (17.9)                                                           | -3.1 (-9.7 to 3.4)                                                    | -0.16 (-0.49 to 0.17)                                                                    |
| Psychosocial health                                                           | 80.2 (13.5)                                                         | 87.9 (12.4)                                                           | -7.2 (-11.1 to -3.3)                                                  | -0.45 (-0.70 to -0.21)                                                                   |

| <b>Outcome<sup>a</sup></b>             | <b>MIS-C<br/>Participants<br/>Score,<br/>mean (SD)<br/>(N = 53)</b> | <b>Control<br/>Participants<br/>Score,<br/>mean (SD)<br/>(N = 42)</b> | <b>Mean Difference<br/>MIS-C vs Controls<br/>(95% CI)<sup>b</sup></b> | <b>Standardized<br/>Mean Difference<br/>MIS-C vs Controls<br/>(95% CI)<sup>b,c</sup></b> |
|----------------------------------------|---------------------------------------------------------------------|-----------------------------------------------------------------------|-----------------------------------------------------------------------|------------------------------------------------------------------------------------------|
| <b>PedsQL Multidimensional Fatigue</b> |                                                                     |                                                                       |                                                                       |                                                                                          |
| Self-report Total                      | 77.8 (16.4)                                                         | 82.4 (13.9)                                                           | -4.0 (-8.8 to 0.9)                                                    | -0.30 (-0.66 to 0.07)                                                                    |
| General fatigue                        | 81.9 (17.8)                                                         | 87.0 (15.9)                                                           | -4.5 (-10.9 to 1.9)                                                   | -0.30 (-0.73 to 0.13)                                                                    |
| Sleep-rest fatigue                     | 74.7 (20.9)                                                         | 80.9 (16.6)                                                           | -6.1 (-12.6 to 0.5)                                                   | -0.33 (-0.67 to 0.03)                                                                    |
| Cognitive fatigue                      | 76.9 (21.3)                                                         | 79.4 (17.8)                                                           | -2.2 (-8.9 to 4.5)                                                    | -0.13 (-0.51 to 0.26)                                                                    |
| Parent-report Total                    | 81.0 (19.0)                                                         | 88.4 (17.0)                                                           | -6.8 (-13.7 to 0.1)                                                   | -0.60 (-1.20 to 0.01)                                                                    |
| General fatigue                        | 81.9 (21.1)                                                         | 90.5 (16.4)                                                           | -8.3 (-15.9 to -0.7)                                                  | -0.62 (-1.19 to -0.05)                                                                   |
| Sleep-rest fatigue                     | 79.7 (22.8)                                                         | 89.5 (15.7)                                                           | -9.8 (-17.6 to -1.9)                                                  | -0.67 (-1.20 to -0.13)                                                                   |
| Cognitive fatigue                      | 81.3 (22.4)                                                         | 85.3 (24.5)                                                           | -2.2 (-10.7 to 6.2)                                                   | -0.15 (-0.71 to 0.41)                                                                    |
| PROMIS Sleep Disturbance               | 52.7 (9.4)                                                          | 50.3 (7.4)                                                            | 2.4 (-1.0 to 5.8)                                                     | 0.24 (-0.10 to 0.58)                                                                     |
| PROMIS Sleep Impairment                | 48.0 (9.5)                                                          | 47.0 (9.2)                                                            | 0.6 (-2.4 to 3.6)                                                     | 0.06 (-0.24 to 0.36)                                                                     |
| Functional Disability Inventory        | 3.6 (5.5)                                                           | 2.6 (3.9)                                                             | 1.0 (-0.9 to 2.9)                                                     | 0.25 (-0.23 to 0.74)                                                                     |

<sup>a</sup>IQ Estimate (MIS-C n = 52, control n = 40), Working Memory Index (n = 53, 39), Processing Speed Index (n = 38, 33; due to non-return of mailed booklets), List Sort Working Memory (n = 51, 39), Picture Sequence Memory (n = 53, 40), D-KEFS (n = 43/44, 36/38; given to ages ≥8y), BRIEF (n = 52, 41), BASC-3 (n = 48, 38), PedsQL self- (n = 46, 37) and parent-report (n = 49, 36; due to survey non-completion), PROMIS (n = 50, 37), and Functional Disability Inventory (n = 46, 38)

<sup>b</sup>Adjusted for matched pairs

<sup>c</sup>Standardized mean difference is the effect size relative to 1 SD based on test parameters or normative data except for Functional Disability Inventory where the control sample SD was substituted due to lack of well-established normative data

<sup>d</sup>Behavior Rating Inventory of Executive Function, includes BRIEF-2 and BRIEF-A

<sup>e</sup>Includes depression, hyperactivity, aggression, atypicality, withdrawal, attention



**eTable 4. Associations Between Selected Demographic and Hospitalization-Related Medical Variables<sup>a</sup> and Neuropsychological Outcome Measures<sup>b</sup> Among MIS-C Participants**

| Outcome <sup>b</sup>                              | Predictor Variable <sup>a</sup>                |                                                |                                  |                                  |
|---------------------------------------------------|------------------------------------------------|------------------------------------------------|----------------------------------|----------------------------------|
|                                                   | SVI                                            | LVEF <sup>d</sup>                              | ICU/Non-ICU                      | Neurologic Presentation          |
|                                                   | Beta Coefficient <sup>c</sup><br>(95% CI)<br>n | Beta Coefficient <sup>c</sup><br>(95% CI)<br>n | Mean Difference<br>(95% CI)<br>n | Mean Difference<br>(95% CI)<br>n |
| List Sort Working Memory                          | -24.6 (-38.3 to -10.8)<br>n = 60               | -3.8 (-7.8 to 0.2)<br>n = 60                   | -3.9 (-10.9 to 3.2)<br>n = 62    | -6.3 (-15.7 to 3.2)<br>n = 60    |
| Verbal Fluency Switching                          | -2.3 (-5.2 to 0.5)<br>n = 50                   | -0.9 (-1.8 to 0.1)<br>n = 51                   | -0.8 (-2.5 to 0.9)<br>n = 52     | 0.0 (-1.9 to 2.0)<br>n = 50      |
| Color-Word Interference Switching                 | -1.7 (-5.7 to 2.2)<br>n = 50                   | -1.4 (-2.3 to -0.4)<br>n = 51                  | -1.9 (-3.6 to -0.3)<br>n = 52    | -2.1 (-4.9 to 0.8)<br>n = 50     |
| BASC Internalizing Problems                       | 3.7 (-11.6 to 19.0)<br>n = 56                  | -2.5 (-5.4 to 0.3)<br>n = 56                   | -6.3 (-13.3 to 0.8)<br>n = 58    | 5.5 (-3.7 to 14.7)<br>n = 56     |
| BASC Depression                                   | 4.2 (-9.9 to 18.3)<br>n = 56                   | -2.2 (-4.9 to 0.5)<br>n = 56                   | -9.9 (-16.2 to -3.5)<br>n = 58   | 2.2 (-7.0 to 11.5)<br>n = 56     |
| BASC Somatization                                 | 4.1 (-13.3 to 21.4)<br>n = 56                  | -2.0 (-5.6 to 1.5)<br>n = 56                   | 0.0 (-8.0 to 8.0)<br>n = 58      | 12.1 (2.4 to 21.8)<br>n = 56     |
| Behavioral Symptoms Index                         | 8.6 (-5.4 to 22.6)<br>n = 56                   | -1.7 (-4.1 to 0.7)<br>n = 56                   | -7.5 (-13.7 to -1.3)<br>n = 58   | -4.1 (-10.3 to 2.1)<br>n = 56    |
| PedsQL Generic (Self- Report)                     | -4.2 (-18.5 to 10.0)<br>n = 55                 | 3.6 (0.5 to 6.6)<br>n = 54                     | 6.5 (-0.3 to 13.2)<br>n = 56     | -1.3 (-10.2 to 7.6)<br>n = 54    |
| Neurological Exam (Abnormal), Odds Ratio (95% CI) | 1.3 (0.1 to 19.7)<br>n = 59                    | 1.5 (0.8 to 3.0)<br>n = 59                     | 2.2 (0.6 to 7.4)<br>n = 61       | 2.2 (0.5 to 8.9)<br>n = 59       |

<sup>a</sup> Predictor variables assessed: Social Vulnerability Index (SVI) , primary caregiver education, length of stay (continuous), length of stay dichotomized (>7 days vs not), need for intensive care, intensive care unit length of stay, severe hemodynamic compromise (shock requiring vasopressors, need for cardiopulmonary resuscitation, or extracorporeal membranous oxygenation), highest CRP, steroid exposure, lowest left ventricular ejection fraction (LVEF) category, neurological symptoms at presentation, neurological examination at follow-up evaluation

<sup>b</sup> Outcome variables assessed: NIH Cognition Toolbox List Sort Working Memory, D-KEFS verbal fluency switching, D-KEFS color-word interference switching, BASC-3 internalizing problems, BASC-3 depression, BASC-3 somatization, BASC-3 behavioral symptoms index, Peds-QL Generic (self-report), neurological examination at follow-up

<sup>c</sup> Beta coefficients from regressions are not standardized

<sup>d</sup> Lowest left ventricular ejection fraction coded as 0 = normal, 1 = mild (45-54%), 2 = moderate (35-44%), or 3 = severe (<35%) depression
