# Supplementary material for: Neurological and Psychological Sequelae Associated With Multisystem Inflammatory Syndrome in Children
Source: PubMed Central journal article supplement (PMC10357334; doi:10.1001/jamanetworkopen.2023.24369), 2023-07-19
Supplement: jamanetwopen-e2324369-s002.pdf [file jamanetwopen-e2324369-s002.pdf]

\*First name, last name, and suffix (if applicable) are required and will appear in PubMed.

| <b>*Group Name(s): Overcoming COVID-19 Investigators</b> |                   |                              |                  |                                    |                                          |                                                         |                                                                                            |
|----------------------------------------------------------|-------------------|------------------------------|------------------|------------------------------------|------------------------------------------|---------------------------------------------------------|--------------------------------------------------------------------------------------------|
| <b>*First Name and Middle Initial(s)</b>                 | <b>*Last Name</b> | <b>*Suffix (eg, Jr, III)</b> | Academic Degrees | Institution                        | Location (city, state/province, country) | Role or Contribution, eg, chair, principal investigator | Group (if more than 1 Group listed in the byline) and/or Subgroup (eg, Steering Committee) |
| Heather                                                  | Kelly             |                              | RN               | Children's of Alabama              | Birmingham, AL                           | Nurse Coordinator                                       |                                                                                            |
| Meghan                                                   | Murdock           |                              | RN               | Children's of Alabama              | Birmingham, AL                           | Nurse Coordinator                                       |                                                                                            |
| Lora                                                     | Martin            |                              | NP               | Children's Hospital of Mississippi | Jackson, MS                              | Nurse Practitioner                                      |                                                                                            |
| Lacy                                                     | Malloch           |                              | BA               | Children's Hospital of Mississippi | Jackson, MS                              | Project Manager                                         |                                                                                            |
| Ashley                                                   | Stanley-Copeland  |                              | MD               | Children's Hospital of Mississippi | Jackson, MS                              | Investigator                                            |                                                                                            |
| Jeanie                                                   | Craft             |                              | BA               | Children's Hospital of Mississippi | Jackson, MS                              | Coordinator                                             |                                                                                            |
