# Supplementary material for: Neurological and Psychological Sequelae Associated With Multisystem Inflammatory Syndrome in Children
Source: PubMed Central journal article supplement (PMC10357334; doi:10.1001/jamanetworkopen.2023.24369), 2023-07-19
Supplement: jamanetwopen-e2324369-s003.pdf [file jamanetwopen-e2324369-s003.pdf]

## Data Sharing Statement

Rollins. Neurological and Psychological Sequelae Associated With Multisystem Inflammatory Syndrome in Children. *JAMA Netw Open*. Published July 19, 2023.

doi:10.1001/jamanetworkopen.2023.24369

### Data

**Data available:** Yes

**Data types:** Deidentified participant data

**How to access data:** Upon request: [caitlin.rollins@childrens.harvard.edu](mailto:caitlin.rollins@childrens.harvard.edu)

**When available:** beginning date: 01-01-2024

### Supporting Documents

**Document types:** None

### Additional Information

**Who can access the data:** Researchers whose proposed use of the data has been approved.

**Types of analyses:** For a specified purpose.

**Mechanisms of data availability:** After approval of a proposal.
